# Supplementary material
Source: PubMed Central journal article supplement (PMC4388177)
Supplement: f-71-00419-sup1.pdf [file f-71-00419-sup1.pdf]

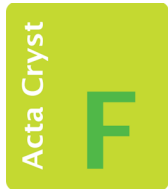

STRUCTURAL BIOLOGY  
COMMUNICATIONS

**Volume 71 (2015)**

**Supporting information for article:**

**Structure of the omalizumab Fab**

**Rasmus K. Jensen, Melanie Plum, Luna Tjerrild, Thilo Jakob, Edzard Spillner and Gregers Rom Andersen**

**IgE Fc sequence**

```

1      10      20      30      40      50      60
ARDFTPPTVK ILQSSCDGGG HFPPTIQLLC LVSGYTPGTI NITWLEDGQV MDVDLSTTST

      70      80      90      100     110     120
TQEGELASTQ SELTLSQKHW LSDRTYTCQV TYQGHTFEVS TKKCADSNPR GVSAYLSRPS

      130     140     150     160     170     180
PFDLFIRKSP TITCLVVDLA PSKGTVNLTW SRASGKPVNH STRKEEKQRN GTLTVTSTLP

      190     200     210     220     230     240
VGTRDWIEGE TYQCRVTHPH LPRALMRSTT KTSGPRAAPE VYAFATPEWP GSRDKRTLAC

      250     260     270     280     290     300
LIQNFMPEDI SVQWLHNEVQ LPDARHSTTQ PRKTKGSGFF VFSRLEVTRA EWEQKDEFIC

      310     320
RAVHEAASPS QTVQRAVSVN PGKHHHH

```

**Heavy chain sequence of Omalizumab Fab**

```

1      10      20      30      40      50      60
EVQLVESGGG LVQPGGSLRL SCAVSGYSIT SGYSWNWIRQ APGKGLEWVA SITYDGSTNY

      70      80      90      100     110     120
NPSVKGRITI SRDDSKNTFY LQMNSLRAED TAVYYCARGS HYFGHWHFAV WGQGTLTVTS

      130     140     150     160     170     180
SASTKGPVSF PLAPSSKSTS GGTAALGCLV KDYFPEPVTV SWNSGALTSG VHTFPAVLQS

      190     200     210
SGLYSLSSVV TVPSSSLGTQ TYICNVNHKP SNTKVDKKV

```

**Light chain sequence of Omalizumab Fab**

```

1      10      20      30      40      50      60
DIQLTQSPSS LSASVGDRVT ITCRASQSVD YDGDSYMNWY QQKPGKAPKL LIYAASYLES

      70      80      90      100     110     120
GVPSRFSGSG SGTDFTLTIS SLQPEDFATY YCQQSHEDPY TFGQGTKVEI KRTVAAPSVF

      130     140     150     160     170     180
IFPPSDEQLK SGTASVVCLL NNFYPREAKV QWKVDNALQS GNSQESVTEQ DSKDSTYSLS

      190     200     210
STLTLSKADY EKHKVYACEV THQGLSSPVT KSFNRGEC

```
